# Supplementary material for: A new layer of regulation of chromosomal passenger complex (CPC) translocation in budding yeast
Source: PubMed Central journal article supplement — Mol Biol Cell. 2023 Aug 17;34(10):ar97. doi: 10.1091/mbc.E23-02-0063 (PMC10551702; doi:10.1091/mbc.e23-02-0063), 2023-08-17

## **Supplementary Materials**

*Molecular Biology of the Cell*

Sherwin *et al.*

## SUPPLEMENTAL INFORMATION

**Figure S1.** Sli15 phosphorylation during cell cycle in WT and *fin1* $\Delta$  cells. G<sub>1</sub>-arrested WT (781-2-2) and *fin1* $\Delta$  (4086-2-3) cells with Sli15-13myc were released into YPD at 30°C.  $\alpha$ -factor was added back after 40 min release to block the following cell cycle. Samples were collected every 20 min to prepare protein samples (bottom) and to count budding index (N = 100 cells) (top). Western blotting was performed with anti-myc antibody. Pgk1, loading control.

**Figure S2.** Abrogating Fin1-PP1 binding restores CPC localization at KT in phospho-deficient *fin1-5A* cells at metaphase. **(A)** KT localization of Ipl1. *cdc26* $\Delta$  *IPL1-3GFP* *NUF2-mCherry* cells (4421-3-2) containing either *FIN1* (pMB6) or *fin1-5A-AA* (pMB5) plasmids were grown to log phase in YPD at 25°C then shifted to 36°C for 2 hr to inactivate Cdc26 for metaphase arrest. Both CDK phosphorylation sites and PP1 binding motif are mutated in Fin1-5A-AA. Representative images show localization of Ipl1-GFP and Nuf2-mCherry (outlined in white dotted line). Scale bar, 5  $\mu$ m. **(B)** Statistical analysis for Ipl1 KT localization. Ipl1 localization was categorized as no KT localization, KT localization, or spindle localization. The results are the average of three experimental repeats (N=3) where 100 cells were counted for each experiment. The bars represent mean values  $\pm$  SD. *p* values were obtained by using a two-tailed unpaired *t*-test. NS: no statistical significance. **(C)** Statistical analysis for Ipl1 intensity at KTs. The intensity of Ipl1 relative to Nuf2 in 50 cells (100 KTs) was quantified using ImageJ. Statistical significance for relative Ipl1 intensity was analyzed by a two-tailed unpaired *t*-test. NS: no statistical significance.

**Figure S3.** *sli15-3* mutant cells show CPC dissociation from the KT in metaphase. *IPL1-3GFP* *NUF2-mCherry* (4516-2-1) and *sli15-3* *IPL1-3GFP* *NUF2-mCherry* (4516-1-1) cells were arrested in G<sub>1</sub> in YPD media at 25°C. Cells were released into the cell cycle at 36°C and samples were collected for imaging. Pictures were taken at 80 min to determine Ipl1 KT localization. Scale bar, 5  $\mu$ m. Representative images were shown in the top panel, and the cell outlined with dotted line exhibited reduced KT localization of Ipl1. The intensity of Ipl1 relative to Nuf2 in 50 cells (100 KTs) was quantified using ImageJ. Statistical significance for relative Ipl1 intensity was analyzed by a two-tailed unpaired *t*-test, with asterisks indicating \*\*\*\* *p* < 0.0001.

**Figure S4.** The growth of phospho-deficient *sli15-17A* and *sli15-6A* mutants in combination with *fnl-5A* when syntelic attachment is induced by *CIK1-CC* overexpression. The strains with the indicated genotypes were grown to saturation in synthetic medium then 10-fold serially diluted and spotted onto glucose and galactose plates. The plates were incubated at 30°C for 2 d for imaging.

**S1 Table.** The relevant genotypes of yeast strains used in this study.

**S2 Table.** The plasmids used in this study.

**S1 Table.** List of relevant genotypes of yeast strains used in this study

| Strains   | Relevant genotypes                                                                                     | Reference   |
|-----------|--------------------------------------------------------------------------------------------------------|-------------|
| Y300 (WT) | MATa <i>ura3-1, his3-11, 15 leu2-3,112 trp1-1, ade2-1, can1-100</i>                                    | Lab stock   |
| 781-2-2   | MATa <i>SLI15-13myc-Sphis5<sup>+</sup></i>                                                             | Lab stock   |
| 4175-1-1  | MATa <i>ipl1-321 SLI15-13myc-Sphis5<sup>+</sup></i>                                                    | This study  |
| 4048-1-3  | MATa <i>cdc14-2 SLI15-13myc-Sphis5<sup>+</sup></i>                                                     | Lab stock   |
| 4086-2-3  | MATa <i>SLI15-13myc-Sphis5<sup>+</sup> fin1Δ::KanMX</i>                                                | This study  |
| 4421-3-2  | MATa <i>cdc26::KanMX IPL1-3GFP-Sphis5<sup>+</sup> NUF2-mCherry</i>                                     | This study  |
| 4426-5-3  | MATa <i>cdc26::KanMX sli15-6A-HIS3 IPL1-3GFP-Sphis5<sup>+</sup> NUF2-mCherry</i>                       | This study  |
| 4437-1-3  | MATa <i>cdc26::KanMX sli15-17A-13myc-KanMX IPL1-3GFP-Sphis5<sup>+</sup> NUF2-mCherry</i>               | This study  |
| 3541-2-3  | MATa <i>cdc14-2 IPL1-3GFP-Sphis5<sup>+</sup> TUB1-mCherry-URA3</i>                                     | This study  |
| 4209-1-1  | MATa <i>cdc14-2 ASE1-GFP-HIS TUB1-mCherry-URA3</i>                                                     | This study  |
| 4210-1-2  | MATa <i>cdc14-2 SLK19-GFP-Sphis5<sup>+</sup> TUB1-mCherry-URA3</i>                                     | This study  |
| 4370-4-3  | MATa <i>cdc15-2 TUB1-GFP-URA3</i>                                                                      | This study  |
| 4370-1-2  | MATa <i>cdc15-2 fin1Δ::KanMX TUB1-GFP-URA3</i>                                                         | This study  |
| 870-1-2   | MATa <i>cdc15-2 TUB1-GFP-LEU2 bar1-1</i>                                                               | Lab stock   |
| 870-2-2   | MATa <i>cdc15-2 slk19::TRP1 TUB1-GFP-LEU2</i>                                                          | Lab stock   |
| 4207-1-3  | MATa <i>SLK19-GFP-Sphis5<sup>+</sup> TUB1-mCherry-URA3</i>                                             | This study  |
| 4207-4-1  | MATa <i>fin1::KanMX SLK19-GFP-Sphis5<sup>+</sup> TUB1-mCherry-URA3</i>                                 | This study  |
| 2567-2-1  | MATa <i>ASE1-GFP-HIS TUB1-mCherry-URA3</i>                                                             | Lab stock   |
| 4205-5-1  | MATa <i>fin1::KanMX ASE1-GFP-HIS TUB1-mCherry-URA3</i>                                                 | This study  |
| 4379-3-3  | MATa <i>promURA3::tetR::GFP-LEU2 CENIV::tetOX448::URA3 SPC110-mCherry::Hygro</i>                       | This study  |
| 4368-3-1  | MATa <i>sli15-17A-13myc-KanMX promURA3::tetR::GFP-LEU2 CENIV::tetOX448::URA3 SPC110-mCherry::Hygro</i> | This study  |
| 4368-1-1  | MATa <i>sli15-6A-HIS3 promURA3::tetR::GFP-LEU2 CENIV::tetOX448::URA3 SPC110-mCherry::Hygro</i>         | This study  |
| Y3594     | MATa <i>sli15-6A-HIS3</i>                                                                              | Uhlmann lab |
| 4053-4-1  | MATa <i>sli15-17A-13myc-KanMX</i>                                                                      | Lab stock   |
| 4516-2-2  | MATa <i>IPL1-3GFP-Sphis5<sup>+</sup> NUF2-mCherry</i>                                                  | This study  |
| 4516-1-1  | MATa <i>IPL1-3GFP-Sphis5<sup>+</sup> NUF2-mCherry sli15-3</i>                                          | This study  |
| 4505-4-3  | MATa <i>mcd1-1 PDS1-18myc-LEU2 sli15-17A-13myc-KanMX</i>                                               | This study  |
| 4517-1-2  | MATa <i>mcd1-1 PDS1-18myc-LEU2 SLI15-13myc-Sphis5<sup>+</sup></i>                                      | This study  |
| JBY649    | MATa <i>PDS1-18myc-LEU2</i>                                                                            | Lab stock   |
| 4595-2-1  | MATa <i>SLI15-13myc-Sphis5<sup>+</sup> P<sub>GAL</sub>CDC20-TRP1</i>                                   | This study  |
| 4600-2-2  | MATa <i>SLI15-13myc-Sphis5<sup>+</sup> P<sub>GAL</sub>CDC20-TRP1 ipl1-321</i>                          | This study  |
| EGM25     | MATa <i>sli15-6A-13myc-TRP1</i>                                                                        | This study  |

**S2 Table.** List of plasmids used in this study

| <b>Name</b> | <b>Relevant genes</b>                       | <b>Reference</b> |
|-------------|---------------------------------------------|------------------|
| p1218       | <i>CEN-TRP1</i> vector                      | Lab stock        |
| pHL002      | <i>P<sub>GAL</sub>-myc-CIK1-CC-TRP1</i>     | Lab stock        |
| pRS416      | <i>CEN-URA3</i> vector                      | Phil Hieter      |
| pYW200      | <i>P<sub>GAL</sub>-myc-CIK1-CC-URA3</i>     | Lab stock        |
| pMB6        | <i>P<sub>FINI</sub>-FIN1-TRP1</i>           | Lab stock        |
| pMB7        | <i>P<sub>FINI</sub>-fin1-5A-TRP1</i>        | Lab stock        |
| pMB5        | <i>P<sub>FINI</sub>-fin1-5A-AA-TRP1</i>     | Lab stock        |
| pSB1252     | <i>P<sub>FINI</sub>-FIN1-GFP-LEU2</i>       | Biggins lab      |
| pSB1359     | <i>P<sub>FINI</sub>-fin1-5A-GFP-LEU2</i>    | Biggins lab      |
| pSB1361     | <i>P<sub>FINI</sub>-fin1-5A-AA-GFP-LEU2</i> | Biggins lab      |



# Supplemental Fig. S2

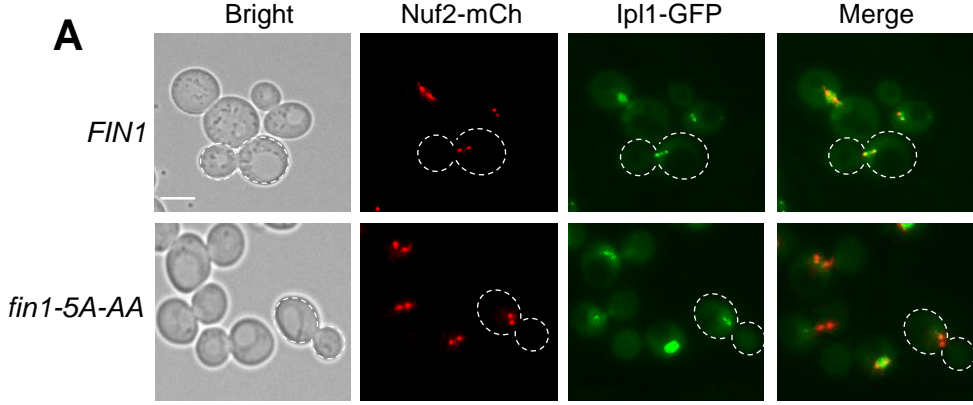

*cdc26Δ*, 100 minutes after G<sub>1</sub> release at 36°C

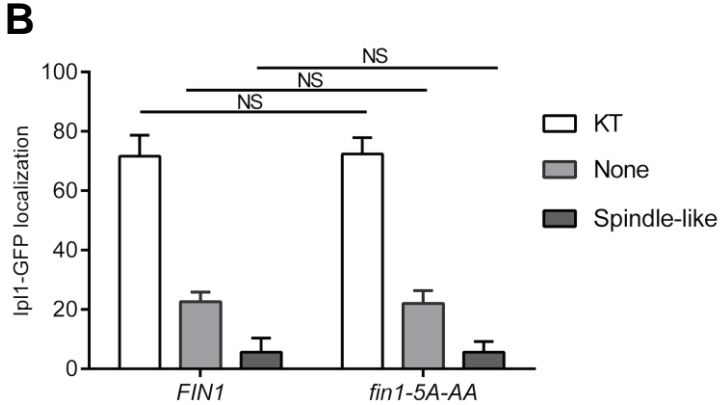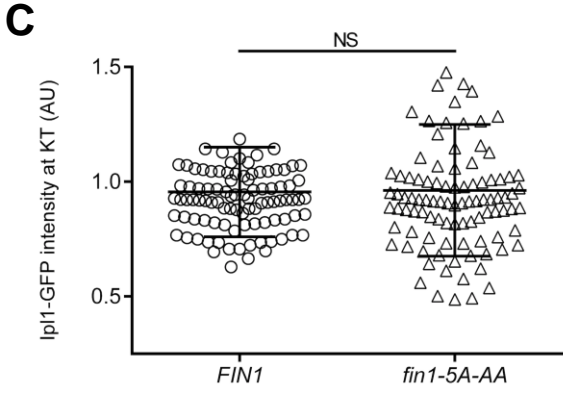

## Supplemental Fig. S3

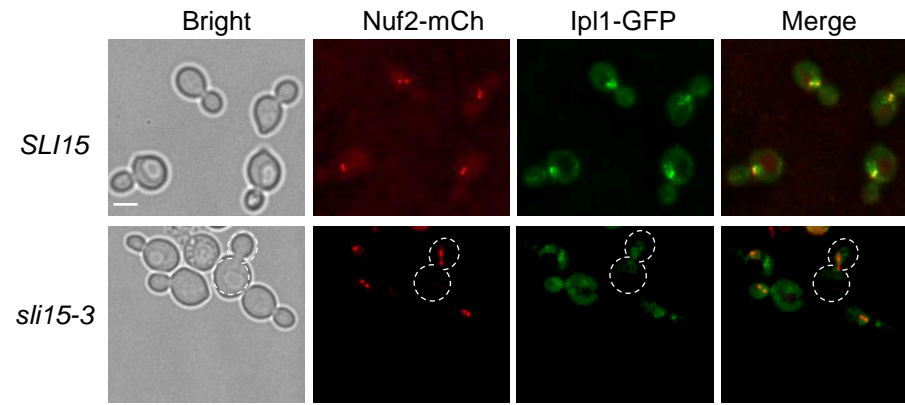

80 minutes after G<sub>1</sub> release at 36°C

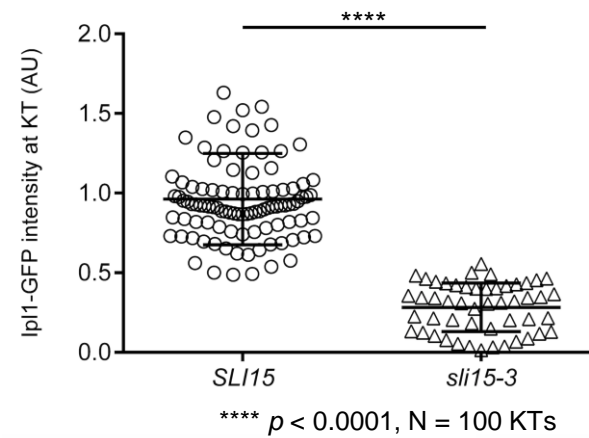



## Supplemental Fig. S4

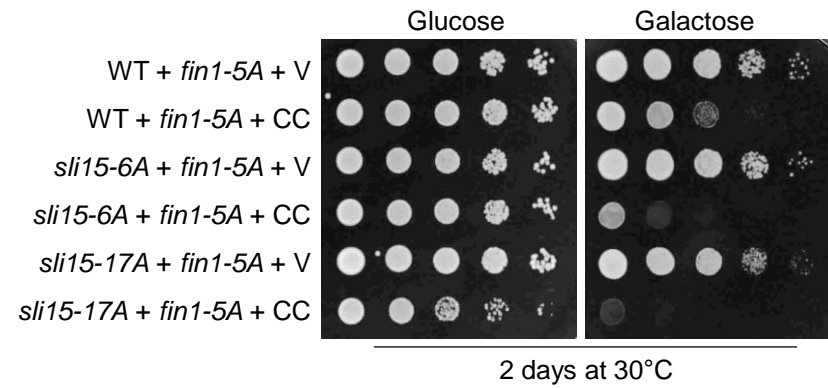

Supplement: mbc-34-ar97-s001.pdf [file mbc-34-ar97-s001.pdf]
